# Supplementary material for: COMMD1 is linked to the WASH complex and regulates endosomal trafficking of the copper transporter ATP7A
Source: PubMed Central journal article supplement — Mol Biol Cell. 2015 Jan 1;26(1):91–103. doi: 10.1091/mbc.E14-06-1073 (PMC4279232; doi:10.1091/mbc.e14-06-1073), 2015-01-01
Supplement: supp_E14-06-1073v1_CombinedSupMats.pdf [file supp_E14-06-1073v1_CombinedSupMats.pdf]

# Supplemental Materials

*Molecular Biology of the Cell*

Phillips-Krawczak et al.

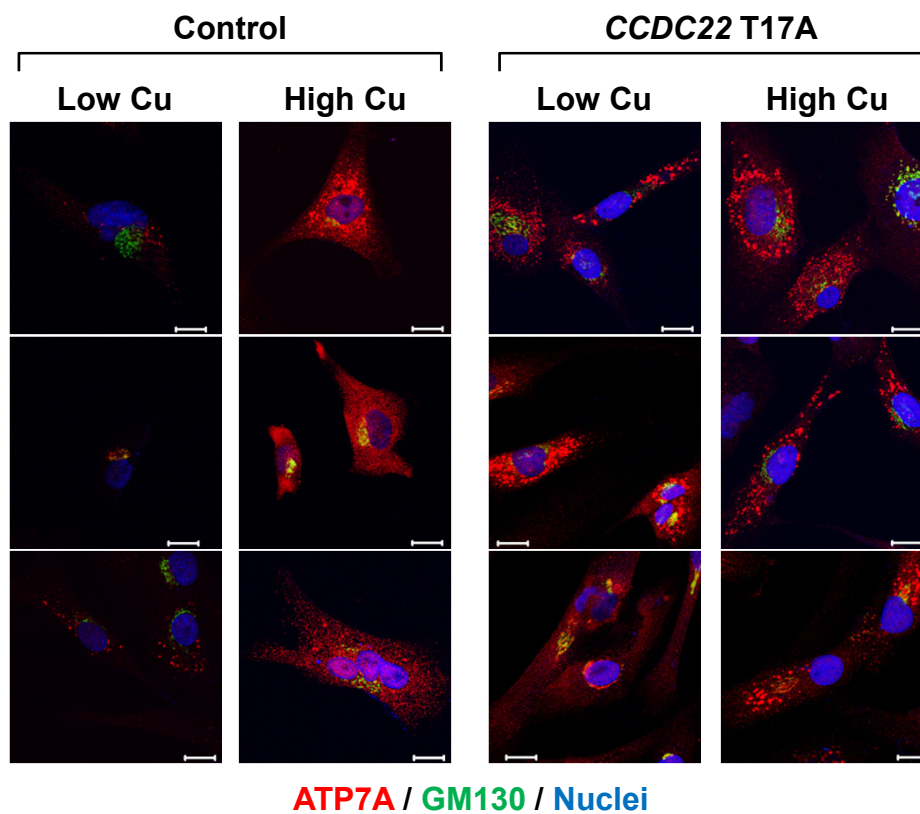

**Figure S1. Role of CCDC22 in ATP7A localization.** ATP7A localization in response to copper treatment was evaluated in control and CCDC22 T17A mutant fibroblasts. Scale bar = 20  $\mu$ m.

**A**

| Gene                      |               | Identity (%) |      |
|---------------------------|---------------|--------------|------|
| Species                   | Symbol        | Protein      | DNA  |
| <b>H.sapiens</b>          | <b>CCDC22</b> |              |      |
| vs. <i>P.troglodytes</i>  | CCDC22        | 100.0        | 99.6 |
| vs. <i>M.mulatta</i>      | CCDC22        | 98.4         | 98.1 |
| vs. <i>C.lupus</i>        | CCDC22        | 91.5         | 89.6 |
| vs. <i>B.taurus</i>       | CCDC22        | 90.9         | 90.1 |
| vs. <i>M.musculus</i>     | Ccdc22        | 88.0         | 85.7 |
| vs. <i>R.norvegicus</i>   | Ccdc22        | 87.9         | 85.7 |
| vs. <i>D.rerio</i>        | ccdc22        | 58.0         | 61.1 |
| vs. <i>D.melanogaster</i> | CG9951        | 30.6         | 44.9 |
| vs. <i>A.gambiae</i>      | CCDC22_ANOGA  | 38.8         | 51.0 |
| vs. <i>A.thaliana</i>     | AT1G55830     | 34.0         | 44.3 |

**B**

| Gene                      |                 | Identity (%) |      |
|---------------------------|-----------------|--------------|------|
| Species                   | Symbol          | Protein      | DNA  |
| <b>H.sapiens</b>          | <b>CCDC93</b>   |              |      |
| vs. <i>M.mulatta</i>      | LOC694513       | 98.8         | 98.5 |
| vs. <i>C.lupus</i>        | CCDC93          | 95.4         | 91.9 |
| vs. <i>B.taurus</i>       | CCDC93          | 93.8         | 90.4 |
| vs. <i>M.musculus</i>     | Ccdc93          | 92.1         | 86.8 |
| vs. <i>R.norvegicus</i>   | Ccdc93          | 93.0         | 86.7 |
| vs. <i>G.gallus</i>       | CCDC93          | 80.8         | 75.3 |
| vs. <i>D.rerio</i>        | ccdc93          | 70.9         | 67.6 |
| vs. <i>D.melanogaster</i> | fidipidine      | 41.7         | 50.2 |
| vs. <i>A.gambiae</i>      | AgaP_AGAP009044 | 44.4         | 52.9 |
| vs. <i>C.elegans</i>      | C16A11.2        | 24.3         | 39.3 |
| vs. <i>A.thaliana</i>     | AT4G32560       | 30.4         | 44.5 |

**C**

| Gene                      |                 | Identity (%) |      |
|---------------------------|-----------------|--------------|------|
| Species                   | Symbol          | Protein      | DNA  |
| <b>H.sapiens</b>          | <b>C16orf62</b> |              |      |
| vs. <i>P.troglodytes</i>  | C16H16orf62     | 98.8         | 98.9 |
| vs. <i>M.mulatta</i>      | LOC695027       | 98.1         | 97.5 |
| vs. <i>C.lupus</i>        | C6H16orf62      | 96.6         | 92.0 |
| vs. <i>B.taurus</i>       | C25H16orf62     | 96.9         | 91.9 |
| vs. <i>M.musculus</i>     | 9030624J02Rik   | 92.3         | 86.2 |
| vs. <i>R.norvegicus</i>   | LOC361635       | 93.7         | 87.6 |
| vs. <i>G.gallus</i>       | C14H16orf62     | 86.3         | 77.1 |
| vs. <i>D.rerio</i>        | zgc:163107      | 74.0         | 69.2 |
| vs. <i>D.melanogaster</i> | CG8202          | 44.7         | 52.1 |
| vs. <i>A.gambiae</i>      | AgaP_AGAP001150 | 48.9         | 53.5 |
| vs. <i>C.elegans</i>      | CELE_F26G1.1    | 24.1         | 39.0 |
| vs. <i>A.thaliana</i>     | AT1G50730       | 25.5         | 42.6 |

**Figure S2. Conservation of CCC complex components. (A-C).** Protein and DNA sequence identity from various organisms compiled from NCBI HomoloGene Pairwise Alignment Scores. CCDC22, CCDC93 and C16orf62 are displayed.

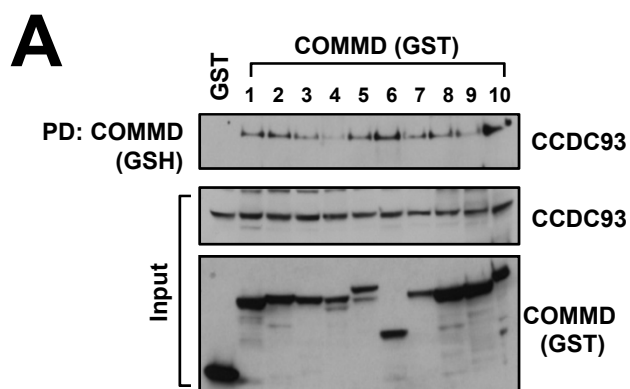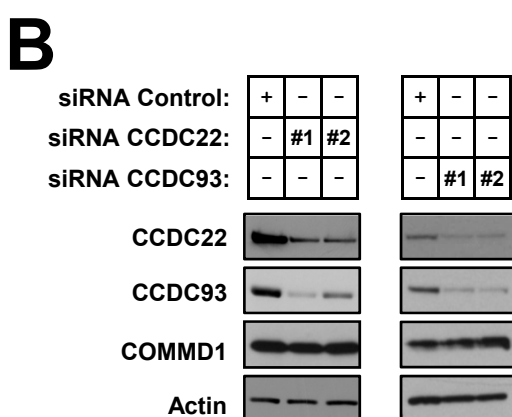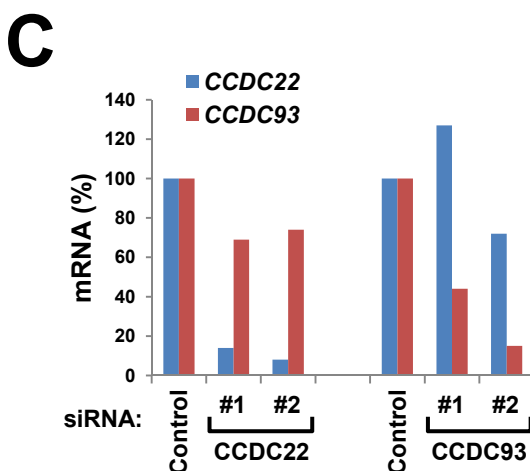

**Figure S3. CCC complex shows interdependency for complex stability. (A)** Binding to CCDC93 was evaluated by expressing COMMD proteins fused to GST in HEK293T cells. The proteins were subsequently precipitated from Triton X-100 lysates and the recovered material was immunoblotted for endogenous CCDC93 or GST. PD, pull-down. **(B, C)** Protein and RNA was isolated from HeLa cells transfected with either control siRNA or siRNA toward CCDC22 or CCDC93. Subsequently, western blot analysis (B) and qRT-PCR (C) was performed to determine the effect on CCDC22 and CCDC93 expression.

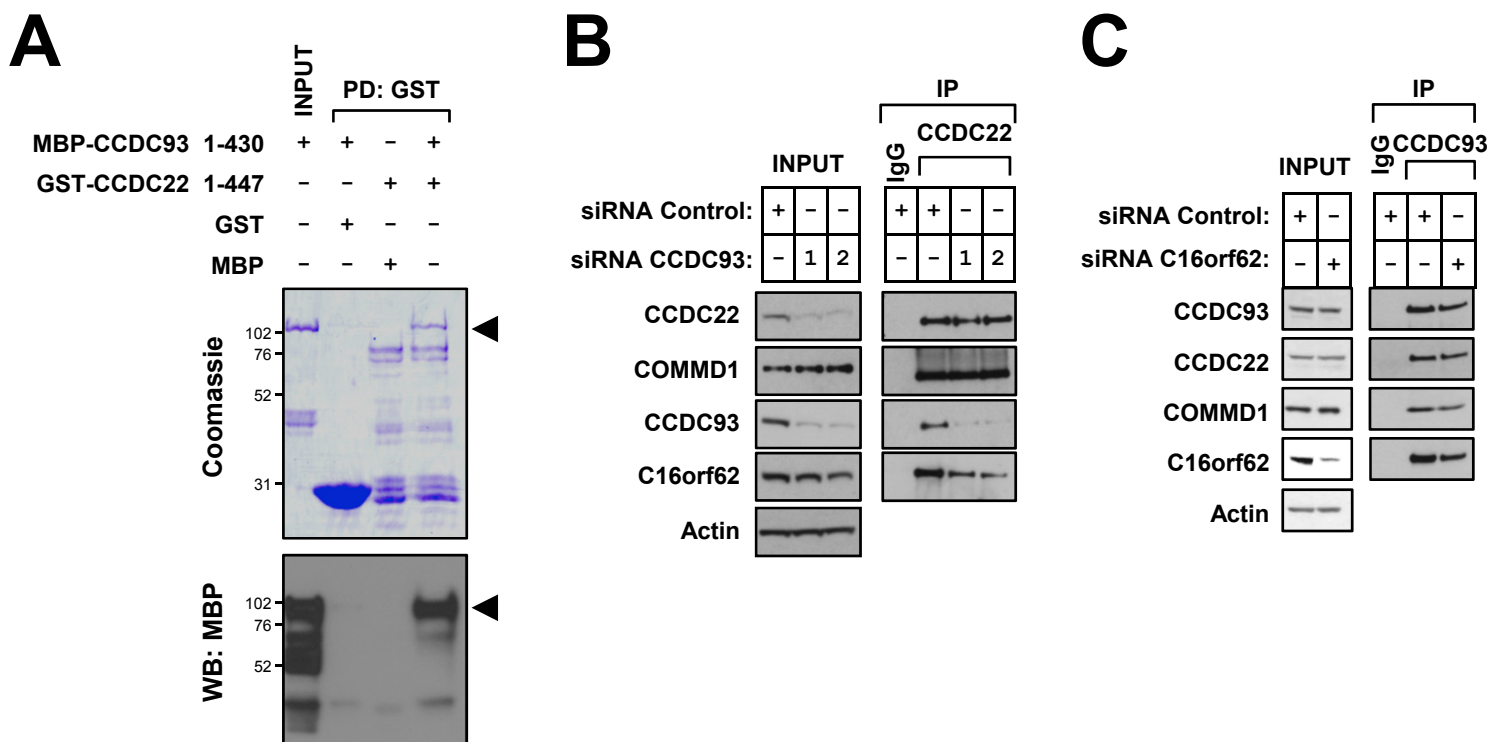

**Figure S4. Interactions that mediate CCC complex assembly. (A)** *In vitro* interactions between *E. coli* generated recombinant CCDC22 and CCDC93 fragments was assessed. After precipitation of GST-CCDC22, the presence of co-precipitated MBP-CCDC93 was determined by Coomassie staining and by immunoblotting. **(B)** CCDC93 was silenced in HEK293T cells using two independent siRNA duplexes. Subsequently, CCDC22 was immunoprecipitated and interactions with other CCC components were assessed by immunoblotting. **(C)** C16orf62 was silenced by siRNA in HEK293T cells. Subsequently, CCDC93 was immunoprecipitated and co-precipitated proteins were detected by immunoblotting.

*Drosophila*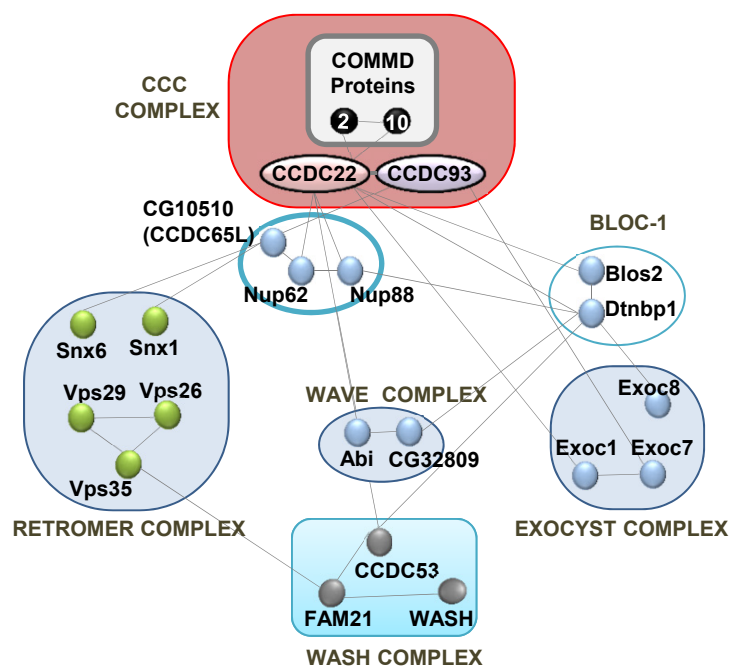

**Figure S5. CCC complex *Drosophila* interaction map.** Interaction maps between CCC complex components and other cellular complexes were drawn using data extracted from NCBI. Intra-complex interactions, where useful, were also indicated.

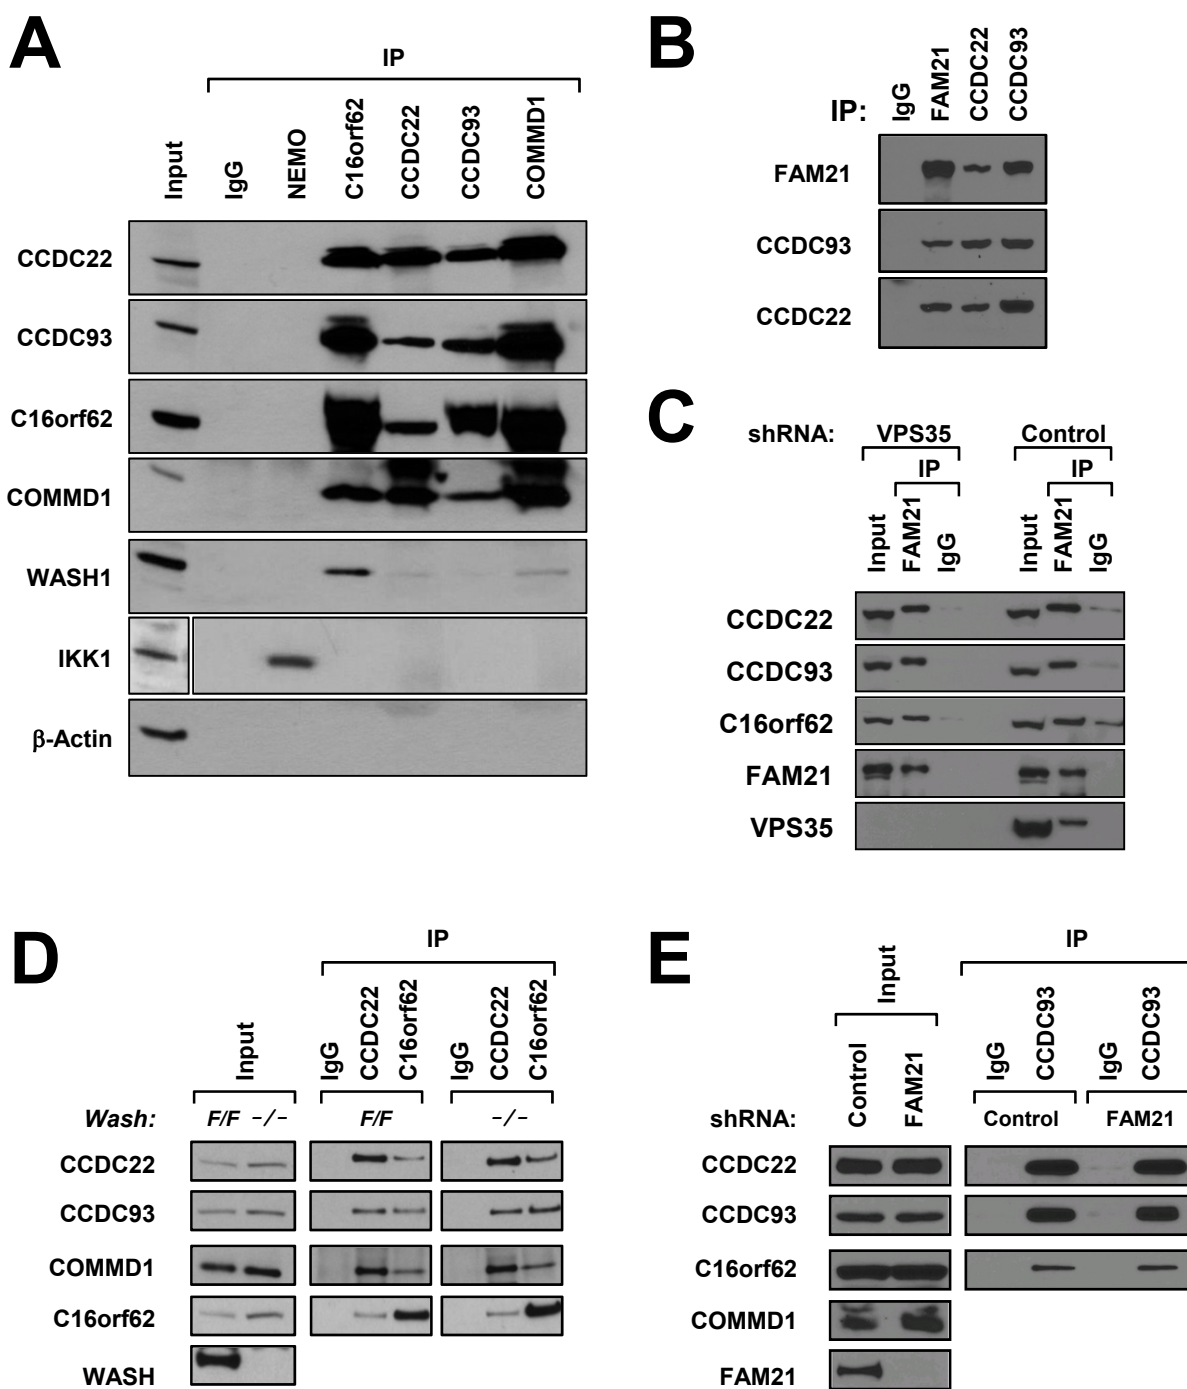

**Figure S6. CCC complex interactions do not require retromer or WASH complex.** (A) Coprecipitation between CCC complex components, as well as the WASH complex subunit WASH1. The coiled-coil protein NEMO, and its known interacting partner IKK1, are included as additional controls. (B) HeLa cell lysates were immunoprecipitated and immunoblotted as indicated to assess CCC complex interactions with FAM21. (C,D) Cell lysates from the indicated cell lines were used for immunoprecipitation and immunoblotting analysis to assess CCC interactions in the absence of retromer (C, using HeLa cells expressing shRNA targeting VPS35) or WASH (D, using Wash-deficient fibroblasts). (E) Interactions between CCDC93 and its partners CCDC22 and C16orf62 were assessed by co-immunoprecipitation in control and FAM21-depleted HeLa cells.

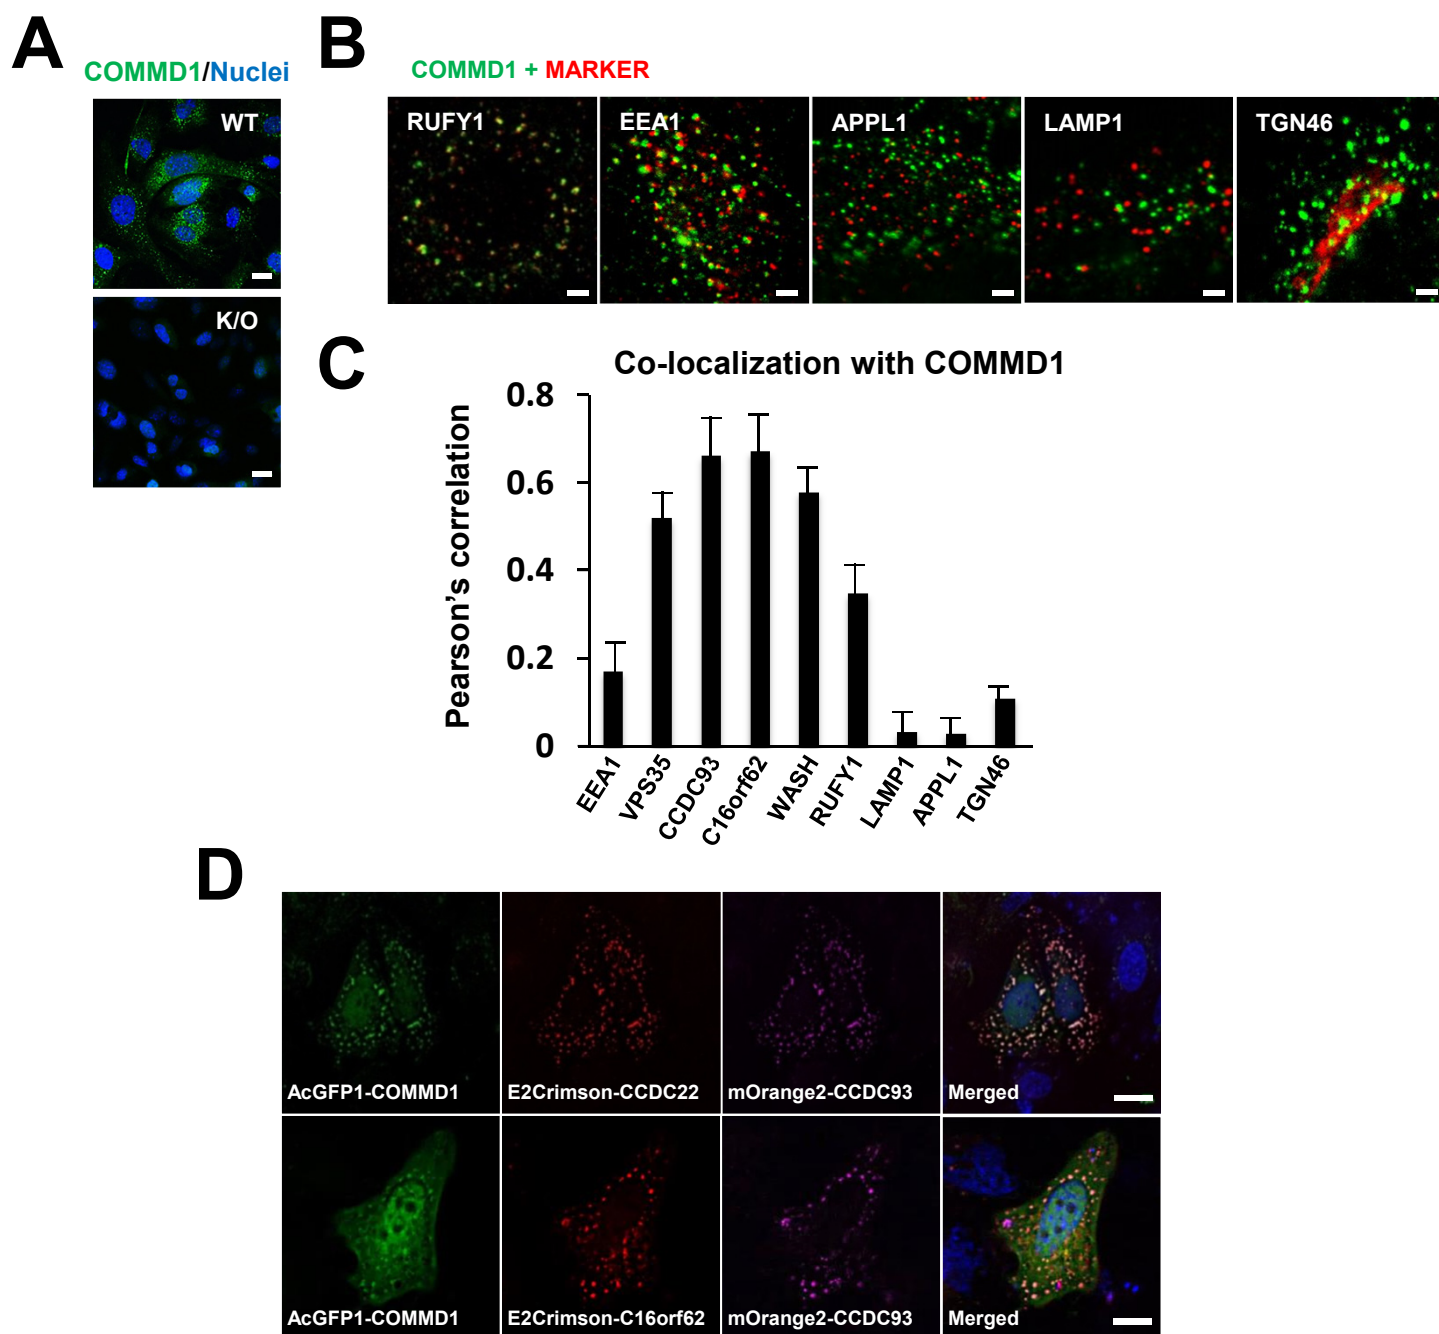

**Figure S7. CCC complex localizes to distinct endosomal compartments enriched in WASH and Retromer.** (A) *Commd1* deficient (*Commd1*<sup>-/-</sup>) and isogenic control fibroblasts were stained for COMMD1 (green) and nuclei (blue) and imaged by confocal microscopy (scale bar of 10  $\mu$ m). (B, C) Co-localization of endogenous COMMD1 (green) and various vesicular markers, as indicated, was assessed by immunofluorescence staining of HeLa cells (scale bar of 5  $\mu$ m). Representative images are shown (B) and co-localization coefficients were calculated and plotted based on these images as well as those in Figure 3C,D (C). (D) Live cell imaging of HeLa cells transiently expressing the indicated fluorescent proteins depicts the co-localization of CCC complex components. Scale bar = 5  $\mu$ m.



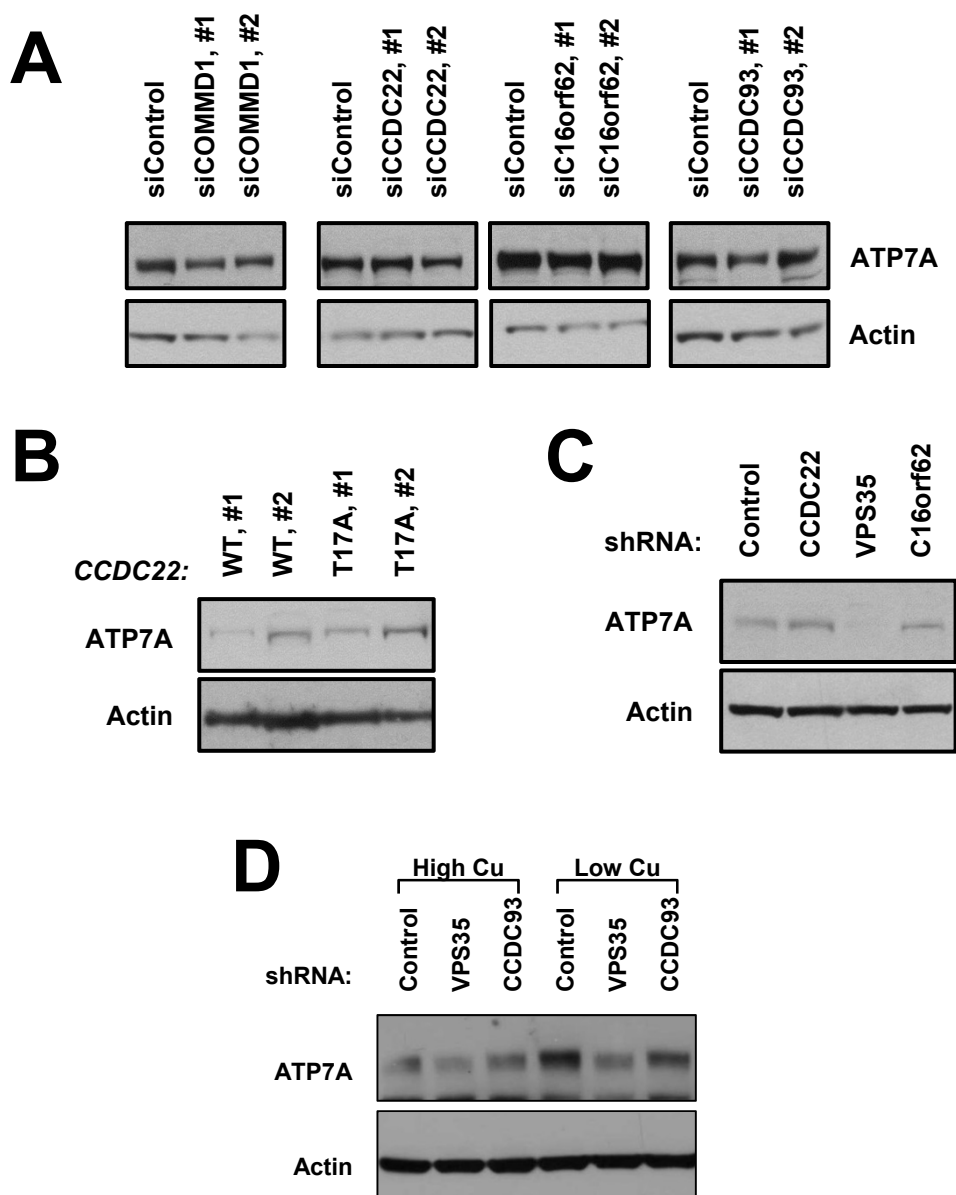

**Figure S8. Effects of CCC deficiency on ATP7A protein expression.** (A) HeLa cells were transfected with the indicated siRNA oligonucleotides and the expression levels of ATP7A were ascertained by immunoblot. (B) ATP7A levels in fibroblasts derived from 2 control individuals (WT) and two patients with the *CCDC22* T17A mutation. (C) ATP7A levels in cell lines with stable silencing of the indicated genes. Only VPS35 depletion led to significant effects on ATP7A expression levels. (D) ATP7A levels in the indicated cells lines were evaluated under conditions of high and low copper availability in the media.

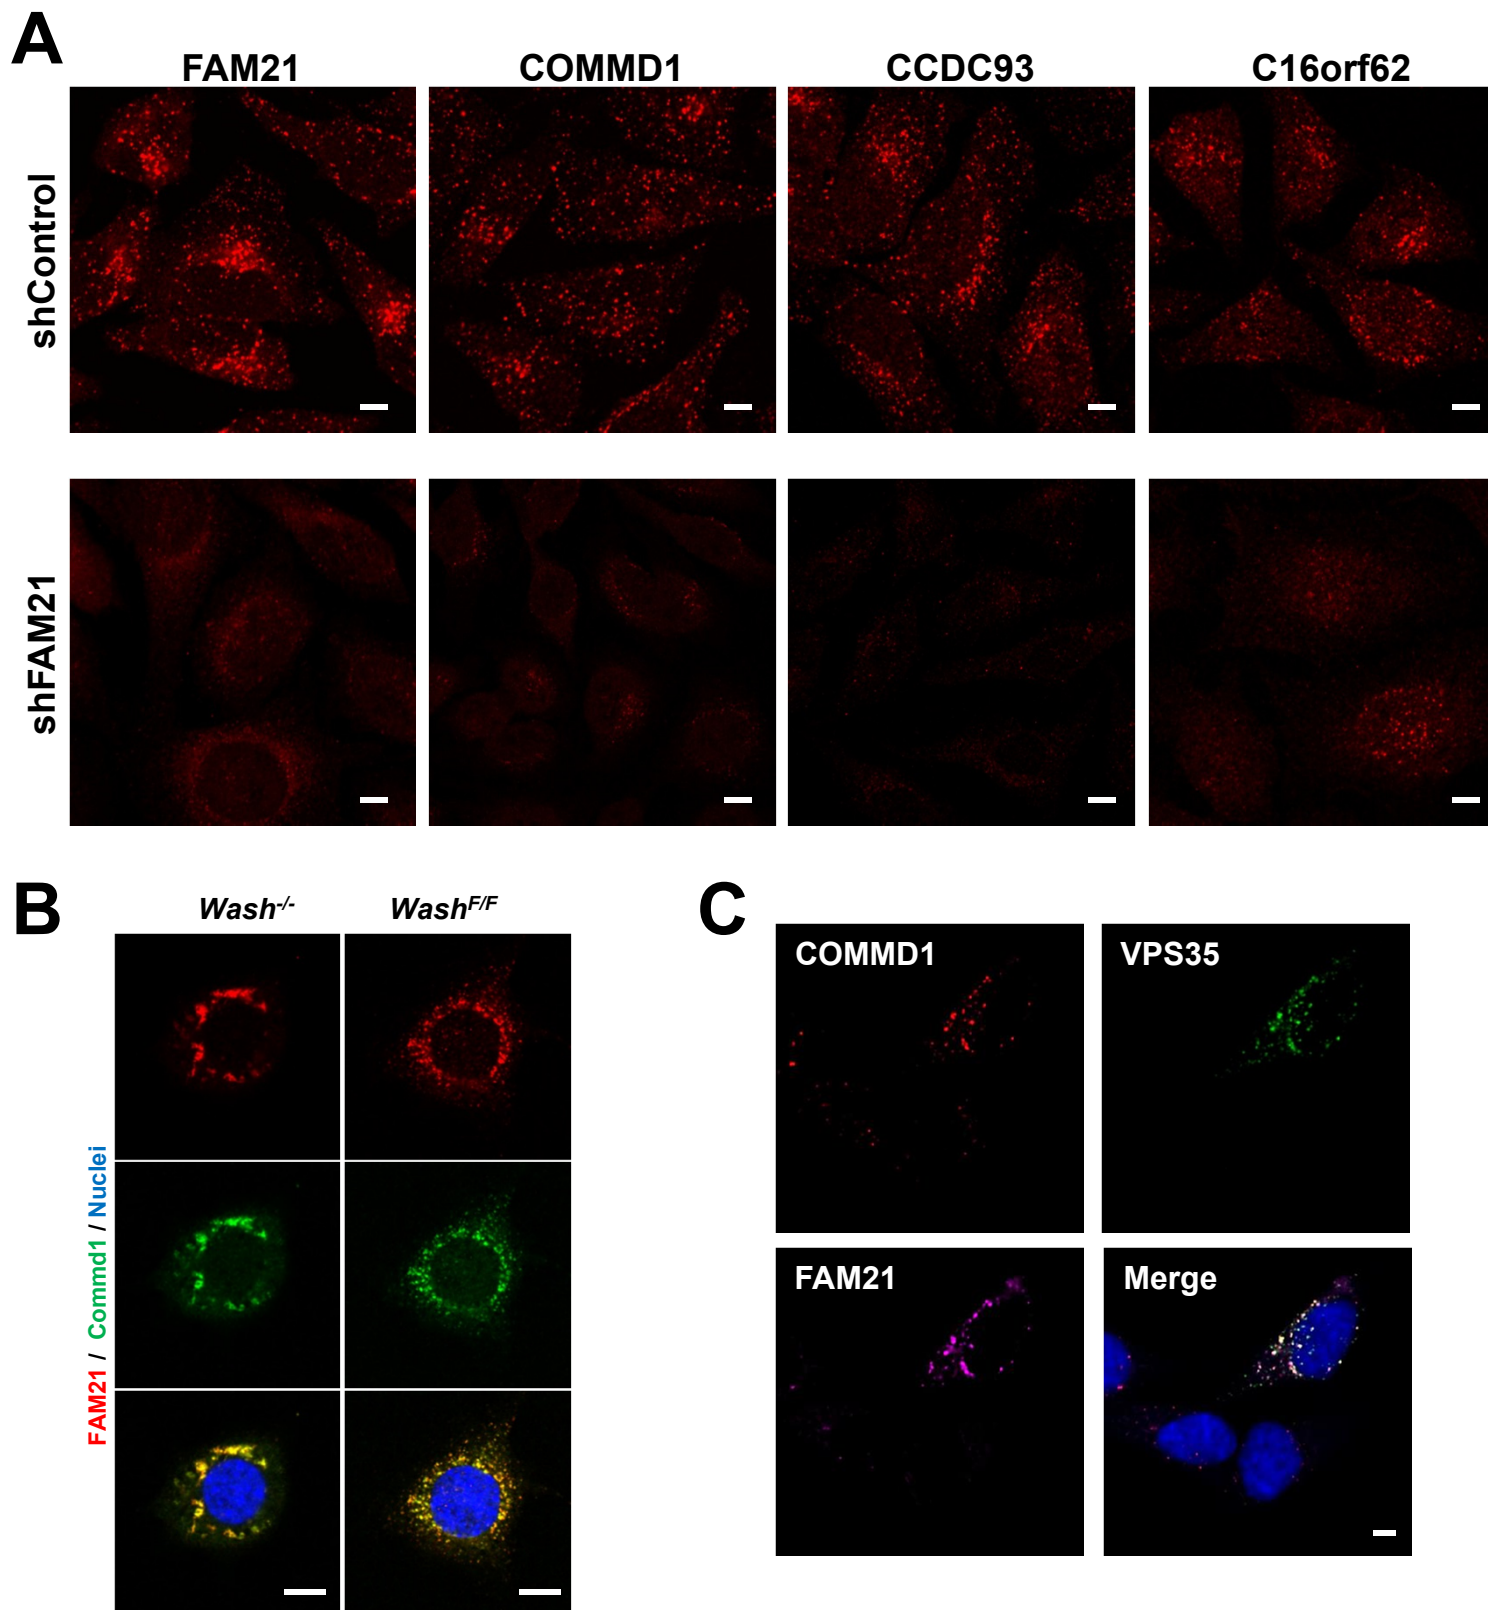

**Figure S9. CCC complex localizes to endosomes with FAM21.** (A) Enlarged images from Figure 5A showing only staining for the indicated proteins in the control and shFAM21-depleted HeLa cell lines. Scale bar = 5  $\mu$ m. (B) WASH-deficient (*Wash*<sup>-/-</sup>) and isogenic control fibroblasts were stained with anti-COMMD1 antibody (green), anti-FAM21 (red) and nuclei (blue) and imaged by confocal microscopy. Scale bar = 10  $\mu$ m. (C) HeLa scramble control and shVPS35 cells were mixed 1:1, plated on coverslips and stained as indicated. Scale bar = 5  $\mu$ m.

**A**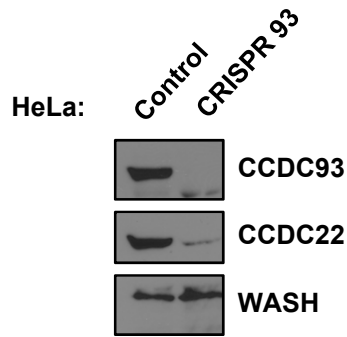**B**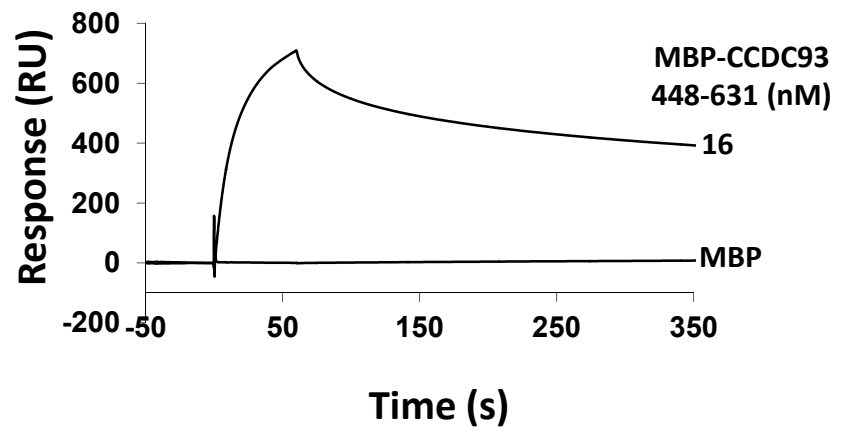**C**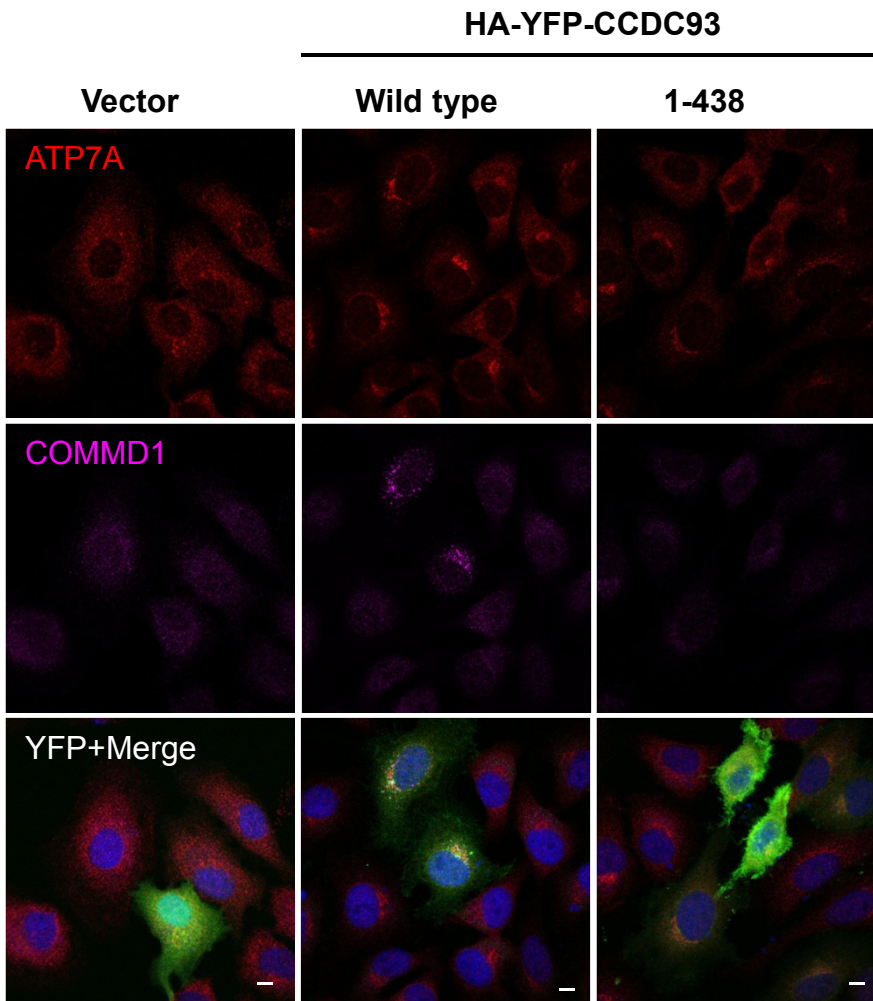

**Figure S10. (A)** CRISPR/Cas9 mediated deletion of CCDC93 in HeLa cells. Loss of CCDC93 expression is shown by WB, which also demonstrates the concurrent reduction in CCDC22 expression. **(B)** Control SPR experiment. The indicated concentrations of MBP or MBP-CCDC93 were assessed for binding with GST-FAM21-FN using SPR. **(C)** Low magnification images of the CRISPR-93 HeLa line transfected with YFP vector or YFP-CCDC93 wild type or 1-438 mutant and imaged for ATP7A and COMMD1 localization under low copper conditions. Scale bar = 10 $\mu$ m.

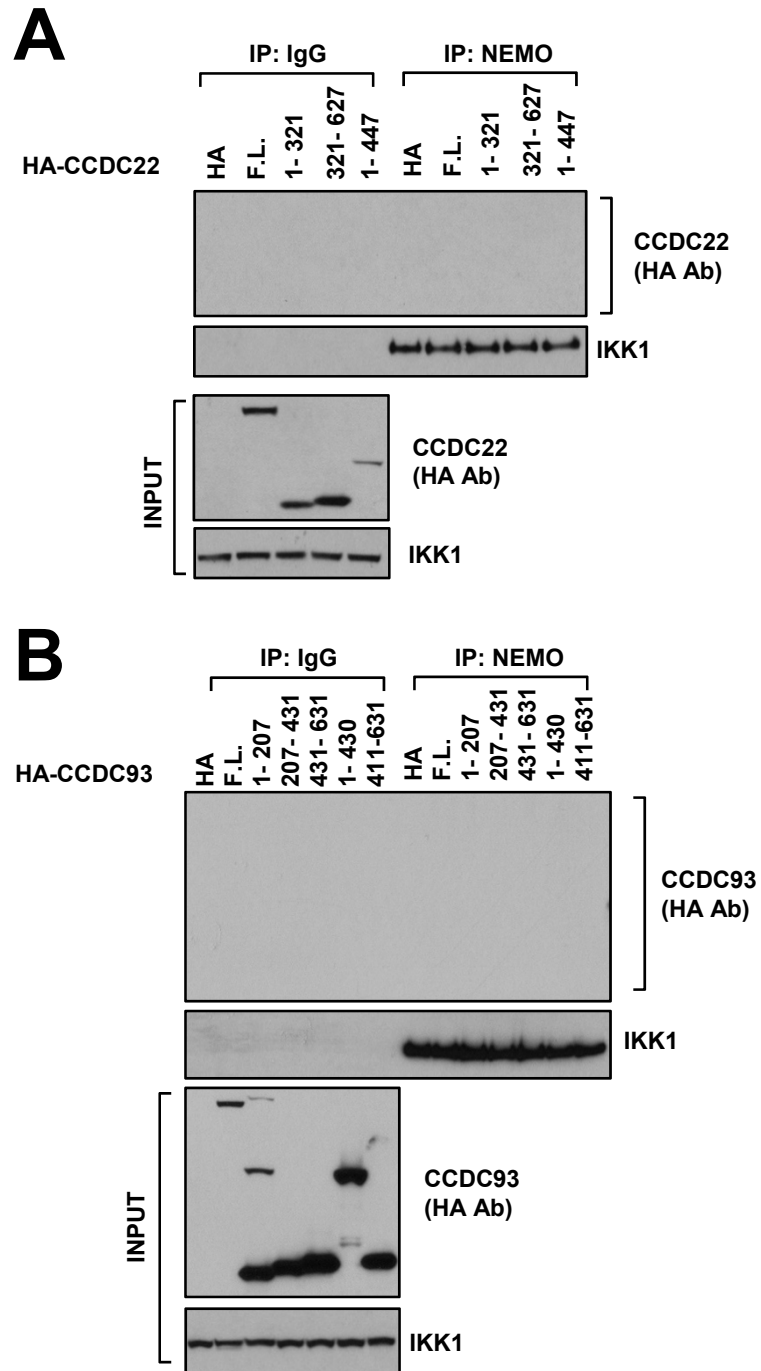

**Figure S11. (A, B)** The indicated domains of CCDC22 (A) and CCDC93 (B) were expressed in 293 cells. Subsequently, cell lysates were subjected to immunoprecipitation with control IgG or an antibody against NEMO. IKK1 is a known partner of NEMO and serves as a positive control.

**Table S1: siRNA and shRNA sequences utilized**

| <i>siRNA sequences</i>     |                       |
|----------------------------|-----------------------|
| <i>Gene target (human)</i> | <i>Oligo sequence</i> |
| <i>CCDC22# 1</i>           | CCACUGAGCUGGUUGUAGA   |
| <i>CCDC22 # 2</i>          | CCAAGACUGGUGCUCCUAA   |
| <i>CCDC93 # 1</i>          | CCGUAUAUCACCUACAAGA   |
| <i>CCDC93# 2</i>           | GAUUGUGUCCGAGUAUGCA   |
| <i>C16orf62 # 1</i>        | GAGAAAUCCUUGCCCGGUA   |
| <i>C16orf62 # 2</i>        | GAUCCUAGAGCAUCUGAAA   |
| <i>shRNA sequences</i>     |                       |
| <i>Gene target (human)</i> | <i>shRNA sequence</i> |
| <i>CCDC22</i>              | GATGAGCTTGTGTTCAAGGAT |
| <i>CCDC93</i>              | GACCTAGACAGACGGTATAAT |
| <i>C16orf62</i>            | GCCTGTTCTTGTGCAGTTGAT |
| <i>FAM21</i>               | CCCCACAGCAAACCTTCTAAA |
| <i>VPS35</i>               | AACAGAGCAGATTAACAAACA |

**Table S2: Antibodies utilized**

| <i>Target protein</i> | <i>Supplier</i>           | <i>Cat. No.</i> |
|-----------------------|---------------------------|-----------------|
| GM130                 | BD Transduction labs      | 610822          |
| CCDC22                | ProteinTech Group         | 16636-1-AP      |
| CCDC93                | ProteinTech Group         | 20861-1-AP      |
| C16orf62              | Pierce                    | PA5-28553       |
| COMMD1                | R & D systems             | MAB7526         |
| VPS35                 | AbCam                     | ab10099-199     |
| EEA1                  | BD Biosciences            | 610456          |
| APPL1                 | Cell Signaling Technology | 3858S           |
| RUFY1                 | ProteinTech Group         | 13498-1-AP      |
| LAMP1                 | AbCam                     | ab24170         |
| TGN46                 | Sigma Aldrich             | T7576           |
| $\beta$ -Actin        | Sigma Aldrich             | A5441           |
| HA                    | Covance                   | MMS101R         |
| MBP                   | Immuno Consultants Lab    | RMBP45-A-Z      |
| GST                   | Santa Cruz                | Sc-459          |
| N-cadherin            | BD Biosciences            | 610920          |

**Table S3: Primers utilized for qRT-PCR (human genes)**

| <i>Target</i> | <i>Sense primer</i>     | <i>Antisense primer</i>  |
|---------------|-------------------------|--------------------------|
| <i>CCDC93</i> | AGGCTTATCACCCCTTTGACAAG | GGCAGGACCGAGACAATTTTT    |
| <i>CCDC22</i> | CTATCAGAACTTCCTCTACCC   | GGAGAATAGCTGAGTCACCT     |
| <i>ACTB</i>   | GCGGGAAATCGTGCGTGACATT  | GATGGAGTTGAAGGTAGTTTCGTG |
